# Supplementary material
Source: PubMed Central journal article supplement (PMC2712048)
Supplement: mmc1.pdf [file mmc1.pdf]

Biophysical Journal, Volume 96

**Supporting Material**

**Stochastic Simulation of Signal Transduction: Impact of the Cellular Architecture on Diffusion**

Michael T. Klann, Alexei Lapin, and Matthias Reuss

## Supplemental Material: Simulation Parameters and Results

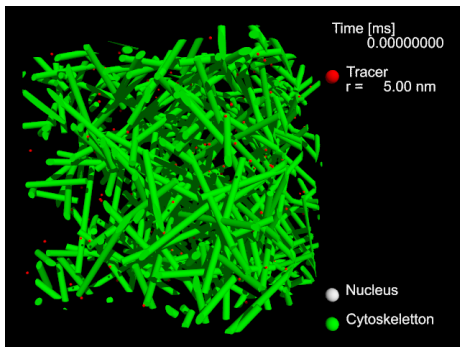

**Cytoskeleton  
Volume Fraction  
0.0505**

**Filament Properties**  
Radius = 12.5 nm  
Length = 500 nm  
Number = 720

**Simulation Box Size**  
Length = 1000 nm

| $r_{\text{tracer}}$ [nm] | $\Delta x$ [nm] | $\Delta t$ [ $\mu$ s] | $\epsilon$ | $D_{\text{eff}}/D_0$ | SD     |
|--------------------------|-----------------|-----------------------|------------|----------------------|--------|
| 0.0                      | 3.6084          | 2.1701                | 0.0505     | 0.9621               | 0.0047 |
| 2.5                      | 4.3301          | 3.1250                | 0.0724     | 0.9450               | 0.0038 |
| 5.0                      | 5.0518          | 4.2434                | 0.0984     | 0.9289               | 0.0072 |
| 7.5                      | 5.7735          | 5.5556                | 0.1275     | 0.9077               | 0.0034 |
| 10.0                     | 6.4952          | 7.0313                | 0.1603     | 0.8831               | 0.0043 |
| 12.5                     | 7.2169          | 8.6806                | 0.1957     | 0.8580               | 0.0012 |
| 15.0                     | 7.9386          | 10.5035               | 0.2332     | 0.8218               | 0.0038 |
| 17.5                     | 8.6603          | 12.5000               | 0.2727     | 0.7891               | 0.0035 |
| 20.0                     | 9.3819          | 14.6701               | 0.3145     | 0.7566               | 0.0021 |
| 22.5                     | 10.1036         | 17.0139               | 0.3583     | 0.7230               | 0.0061 |
| 25.0                     | 10.8253         | 19.5313               | 0.4007     | 0.6832               | 0.0035 |
| 27.5                     | 11.5470         | 22.2222               | 0.4446     | 0.6444               | 0.0011 |
| 30.0                     | 12.2687         | 25.0868               | 0.4881     | 0.6007               | 0.0030 |

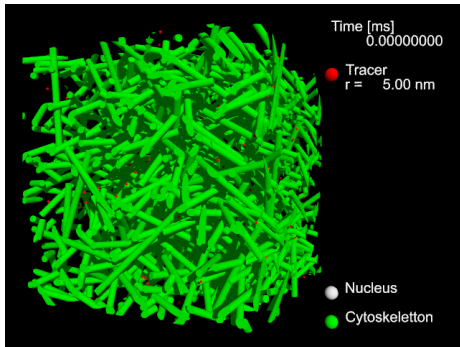

**Cytoskeleton  
Volume Fraction  
0.0997**

**Filament Properties**  
Radius = 12.5 nm  
Length = 500 nm  
Number = 1470

**Simulation Box Size**  
Length = 1000 nm

| $r_{\text{tracer}}$ [nm] | $\Delta x$ [nm] | $\Delta t$ [ $\mu$ s] | $\epsilon$ | $D_{\text{eff}}/D_0$ | SD     |
|--------------------------|-----------------|-----------------------|------------|----------------------|--------|
| 0.0                      | 3.6084          | 2.1701                | 0.0997     | 0.9245               | 0.0077 |
| 2.5                      | 4.3301          | 3.1250                | 0.1418     | 0.8991               | 0.0046 |
| 5.0                      | 5.0518          | 4.2434                | 0.1901     | 0.8562               | 0.0050 |
| 7.5                      | 5.7735          | 5.5556                | 0.2419     | 0.8190               | 0.0029 |
| 10.0                     | 6.4952          | 7.0313                | 0.2982     | 0.7732               | 0.0024 |
| 12.5                     | 7.2169          | 8.6806                | 0.3569     | 0.7225               | 0.0027 |
| 15.0                     | 7.9386          | 10.5035               | 0.4175     | 0.6660               | 0.0031 |
| 17.5                     | 8.6603          | 12.5000               | 0.4772     | 0.6126               | 0.0015 |
| 20.0                     | 9.3819          | 14.6701               | 0.5362     | 0.5507               | 0.0031 |
| 22.5                     | 10.1036         | 17.0139               | 0.5941     | 0.4848               | 0.0017 |
| 25.0                     | 10.8253         | 19.5313               | 0.6490     | 0.4174               | 0.0017 |
| 27.5                     | 11.5470         | 22.2222               | 0.6988     | 0.3534               | 0.0019 |
| 30.0                     | 12.2687         | 25.0868               | 0.7462     | 0.2918               | 0.0015 |

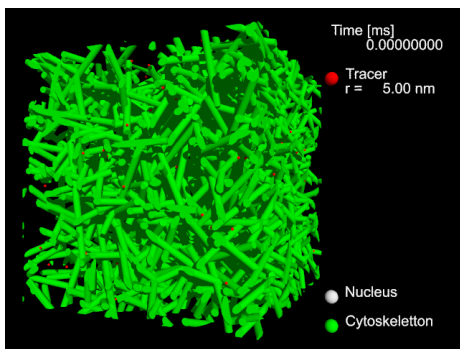

**Cytoskeleton  
Volume Fraction  
0.1514**

**Filament Properties**  
Radius = 12.5 nm  
Length = 500 nm  
Number = 2055

**Simulation Box Size**  
Length = 1000 nm

| $r_{\text{tracer}}$ [nm] | $\Delta x$ [nm] | $\Delta t$ [ $\mu$ s] | $\epsilon$ | $D_{\text{eff}}/D_0$ | SD     |
|--------------------------|-----------------|-----------------------|------------|----------------------|--------|
| 0.0                      | 3.6084          | 2.1701                | 0.1514     | 0.8885               | 0.0045 |
| 2.5                      | 4.3301          | 3.1250                | 0.2132     | 0.8428               | 0.0030 |
| 5.0                      | 5.0518          | 4.2434                | 0.2804     | 0.7884               | 0.0036 |
| 7.5                      | 5.7735          | 5.5556                | 0.3518     | 0.7245               | 0.0048 |
| 10.0                     | 6.4952          | 7.0313                | 0.4247     | 0.6540               | 0.0018 |
| 12.5                     | 7.2169          | 8.6806                | 0.4986     | 0.5796               | 0.0025 |
| 15.0                     | 7.9386          | 10.5035               | 0.5693     | 0.5022               | 0.0030 |
| 17.5                     | 8.6603          | 12.5000               | 0.6372     | 0.4159               | 0.0010 |
| 20.0                     | 9.3819          | 14.6701               | 0.6995     | 0.3305               | 0.0018 |
| 22.5                     | 10.1036         | 17.0139               | 0.7554     | 0.2480               | 0.0007 |
| 25.0                     | 10.8253         | 19.5313               | 0.8038     | 0.1733               | 0.0033 |
| 27.5                     | 11.5470         | 22.2222               | 0.8461     | 0.1075               | 0.0009 |
| 30.0                     | 12.2687         | 25.0868               | 0.8812     | 0.0518               | 0.0040 |

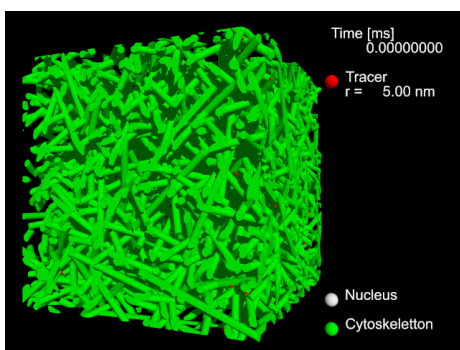

**Cytoskeleton  
Volume Fraction  
0.1989**

**Filament Properties**  
Radius = 12.5 nm  
Length = 500 nm  
Number = 3165

**Simulation Box Size**  
Length = 1000 nm

| $r_{\text{tracer}}$ [nm] | $\Delta x$ [nm] | $\Delta t$ [ $\mu$ s] | $\epsilon$ | $D_{\text{eff}}/D_0$ | SD     |
|--------------------------|-----------------|-----------------------|------------|----------------------|--------|
| 0.0                      | 3.6084          | 2.1701                | 0.1989     | 0.8444               | 0.0109 |
| 2.5                      | 4.3301          | 3.1250                | 0.2757     | 0.7844               | 0.0041 |
| 5.0                      | 5.0518          | 4.2434                | 0.3585     | 0.7141               | 0.0028 |
| 7.5                      | 5.7735          | 5.5556                | 0.4437     | 0.6400               | 0.0010 |
| 10.0                     | 6.4952          | 7.0313                | 0.5274     | 0.5486               | 0.0036 |
| 12.5                     | 7.2169          | 8.6806                | 0.6066     | 0.4586               | 0.0027 |
| 15.0                     | 7.9386          | 10.5035               | 0.6790     | 0.3680               | 0.0021 |
| 17.5                     | 8.6603          | 12.5000               | 0.7446     | 0.2783               | 0.0011 |
| 20.0                     | 9.3819          | 14.6701               | 0.8006     | 0.1931               | 0.0008 |
| 22.5                     | 10.1036         | 17.0139               | 0.8485     | 0.1187               | 0.0025 |
| 25.0                     | 10.8253         | 19.5313               | 0.8874     | 0.0626               | 0.0059 |
| 27.5                     | 11.5470         | 22.2222               | 0.9182     | 0.0187               | 0.0010 |
| 30.0                     | 12.2687         | 25.0868               | 0.9419     | 0.0020               | 0.0005 |

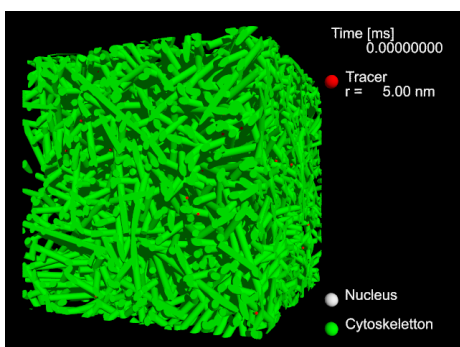

**Cytoskeleton  
Volume Fraction  
0.2491**

**Filament Properties**  
Radius = 12.5 nm  
Length = 500 nm  
Number = 4095

**Simulation Box Size**  
Length = 1000 nm

| $r_{\text{tracer}}$ [nm] | $\Delta x$ [nm] | $\Delta t$ [ $\mu$ s] | $\epsilon$ | $D_{\text{eff}}/D_0$ | SD     |
|--------------------------|-----------------|-----------------------|------------|----------------------|--------|
| 0.0                      | 3.6084          | 2.1701                | 0.2491     | 0.8120               | 0.0106 |
| 2.5                      | 4.3301          | 3.1250                | 0.3402     | 0.7346               | 0.0031 |
| 5.0                      | 5.0518          | 4.2434                | 0.4366     | 0.6445               | 0.0040 |
| 7.5                      | 5.7735          | 5.5556                | 0.5314     | 0.5462               | 0.0015 |
| 10.0                     | 6.4952          | 7.0313                | 0.6214     | 0.4459               | 0.0018 |
| 12.5                     | 7.2169          | 8.6806                | 0.7032     | 0.3409               | 0.0011 |
| 15.0                     | 7.9386          | 10.5035               | 0.7735     | 0.2418               | 0.0018 |
| 17.5                     | 8.6603          | 12.5000               | 0.8328     | 0.1495               | 0.0009 |
| 20.0                     | 9.3819          | 14.6701               | 0.8805     | 0.0767               | 0.0012 |
| 22.5                     | 10.1036         | 17.0139               | 0.9172     | 0.0269               | 0.0005 |
| 25.0                     | 10.8253         | 19.5313               | 0.9448     | 0.0048               | 0.0002 |
| 27.5                     | 11.5470         | 22.2222               | 0.9644     | 0.0001               | 0.0000 |
| 30.0                     | 12.2687         | 25.0868               | 0.9779     | 0.0000               | 0.0000 |

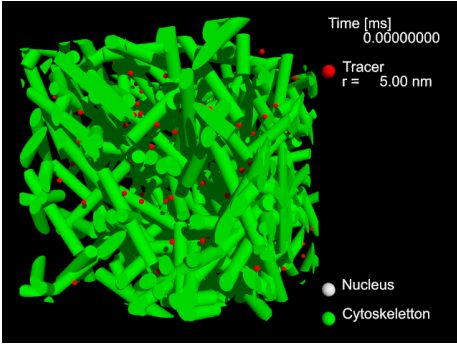

**Cytoskeleton  
Volume Fraction  
0.1497**

**Filament Properties**  
Radius = 12.5 nm  
Length = 200 nm  
Number = 555

**Simulation Box Size**  
Length = 500 nm

| $r_{\text{tracer}}$ [nm] | $\Delta x$ [nm] | $\Delta t$ [ $\mu$ s] | $\epsilon$ | $D_{\text{eff}}/D_0$ | SD     |
|--------------------------|-----------------|-----------------------|------------|----------------------|--------|
| 0.0                      | 3.6084          | 2.1701                | 0.1497     | 0.8906               | 0.0079 |
| 2.5                      | 4.3301          | 3.1250                | 0.2118     | 0.8414               | 0.0027 |
| 5.0                      | 5.0518          | 4.2434                | 0.2821     | 0.7839               | 0.0042 |
| 7.5                      | 5.7735          | 5.5556                | 0.3565     | 0.7181               | 0.0027 |
| 10.0                     | 6.4952          | 7.0313                | 0.4349     | 0.6493               | 0.0038 |
| 12.5                     | 7.2169          | 8.6806                | 0.5116     | 0.5687               | 0.0035 |
| 15.0                     | 7.9386          | 10.5035               | 0.5880     | 0.4881               | 0.0027 |
| 17.5                     | 8.6603          | 12.5000               | 0.6589     | 0.4081               | 0.0032 |
| 20.0                     | 9.3819          | 14.6701               | 0.7239     | 0.3198               | 0.0018 |
| 22.5                     | 10.1036         | 17.0139               | 0.7826     | 0.2377               | 0.0036 |
| 25.0                     | 10.8253         | 19.5313               | 0.8332     | 0.1563               | 0.0034 |
| 27.5                     | 11.5470         | 22.2222               | 0.8755     | 0.0859               | 0.0018 |
| 30.0                     | 12.2687         | 25.0868               | 0.9098     | 0.0315               | 0.0027 |

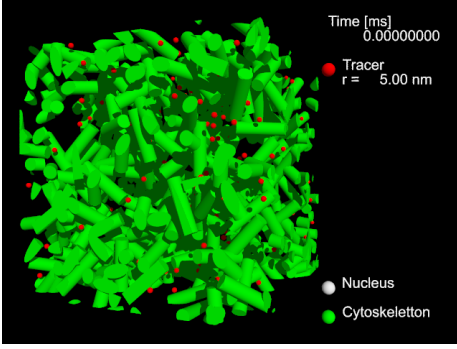

**Cytoskeleton  
Volume Fraction  
0.1505**

**Filament Properties**  
Radius = 12.5 nm  
Length = 100 nm  
Number = 720

**Simulation Box Size**  
Length = 500 nm

| $r_{\text{tracer}}$ [nm] | $\Delta x$ [nm] | $\Delta t$ [ $\mu$ s] | $\epsilon$ | $D_{\text{eff}}/D_0$ | SD     |
|--------------------------|-----------------|-----------------------|------------|----------------------|--------|
| 0.0                      | 3.6084          | 2.1701                | 0.1505     | 0.8933               | 0.0034 |
| 2.5                      | 4.3301          | 3.1250                | 0.2196     | 0.8446               | 0.0042 |
| 5.0                      | 5.0518          | 4.2434                | 0.2978     | 0.7837               | 0.0024 |
| 7.5                      | 5.7735          | 5.5556                | 0.3846     | 0.7100               | 0.0046 |
| 10.0                     | 6.4952          | 7.0313                | 0.4736     | 0.6305               | 0.0030 |
| 12.5                     | 7.2169          | 8.6806                | 0.5621     | 0.5386               | 0.0022 |
| 15.0                     | 7.9386          | 10.5035               | 0.6450     | 0.4473               | 0.0017 |
| 17.5                     | 8.6603          | 12.5000               | 0.7208     | 0.3577               | 0.0025 |
| 20.0                     | 9.3819          | 14.6701               | 0.7879     | 0.2626               | 0.0034 |
| 22.5                     | 10.1036         | 17.0139               | 0.8441     | 0.1649               | 0.0013 |
| 25.0                     | 10.8253         | 19.5313               | 0.8895     | 0.0876               | 0.0029 |
| 27.5                     | 11.5470         | 22.2222               | 0.9247     | 0.0407               | 0.0024 |
| 30.0                     | 12.2687         | 25.0868               | 0.9513     | 0.0063               | 0.0022 |

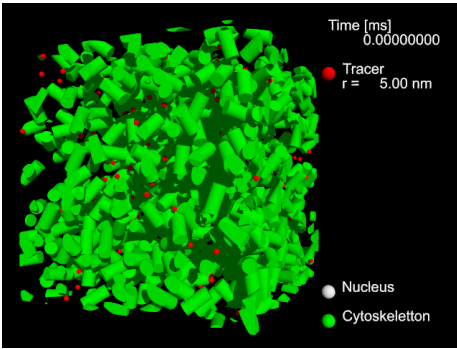

**Cytoskeleton  
Volume Fraction  
0.1493**

**Filament Properties**  
Radius = 12.5 nm  
Length = 50 nm  
Number = 1110

**Simulation Box Size**  
Length = 500 nm

| $r_{\text{tracer}}$ [nm] | $\Delta x$ [nm] | $\Delta t$ [ $\mu$ s] | $\epsilon$ | $D_{\text{eff}}/D_0$ | SD     |
|--------------------------|-----------------|-----------------------|------------|----------------------|--------|
| 0.0                      | 3.6084          | 2.1701                | 0.1493     | 0.9046               | 0.0048 |
| 2.5                      | 4.3301          | 3.1250                | 0.2256     | 0.8467               | 0.0040 |
| 5.0                      | 5.0518          | 4.2434                | 0.3165     | 0.7800               | 0.0040 |
| 7.5                      | 5.7735          | 5.5556                | 0.4173     | 0.6949               | 0.0037 |
| 10.0                     | 6.4952          | 7.0313                | 0.5193     | 0.5947               | 0.0031 |
| 12.5                     | 7.2169          | 8.6806                | 0.6195     | 0.4814               | 0.0038 |
| 15.0                     | 7.9386          | 10.5035               | 0.7108     | 0.3712               | 0.0020 |
| 17.5                     | 8.6603          | 12.5000               | 0.7897     | 0.2589               | 0.0018 |
| 20.0                     | 9.3819          | 14.6701               | 0.8539     | 0.1678               | 0.0061 |
| 22.5                     | 10.1036         | 17.0139               | 0.9036     | 0.0879               | 0.0034 |
| 25.0                     | 10.8253         | 19.5313               | 0.9402     | 0.0276               | 0.0018 |
| 27.5                     | 11.5470         | 22.2222               | 0.9649     | 0.0002               | 0.0000 |
| 30.0                     | 12.2687         | 25.0868               | 0.9808     | 0.0000               | 0.0000 |

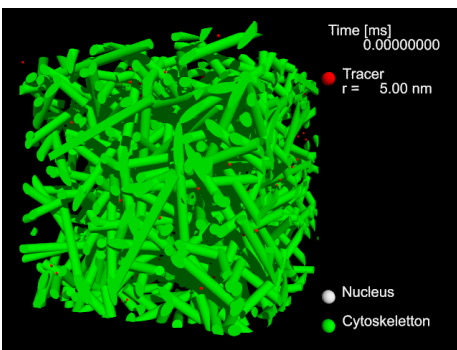

**Cytoskeleton  
Volume Fraction  
0.1508**

**Filament Properties**  
Radius = 17.5 nm  
Length = 500 nm  
Number = 1095

**Simulation Box Size**  
Length = 1000 nm

| $r_{\text{tracer}}$ [nm] | $\Delta x$ [nm] | $\Delta t$ [ $\mu$ s] | $\epsilon$ | $D_{\text{eff}}/D_0$ | SD     |
|--------------------------|-----------------|-----------------------|------------|----------------------|--------|
| 0.0                      | 5.0518          | 4.2535                | 0.1508     | 0.8903               | 0.0051 |
| 2.5                      | 5.7735          | 5.5556                | 0.1939     | 0.8550               | 0.0028 |
| 5.0                      | 6.4952          | 7.0313                | 0.2407     | 0.8236               | 0.0063 |
| 7.5                      | 7.2169          | 8.6806                | 0.2902     | 0.7769               | 0.0072 |
| 10.0                     | 7.9386          | 10.5035               | 0.3427     | 0.7350               | 0.0055 |
| 12.5                     | 8.6603          | 12.5000               | 0.3958     | 0.6872               | 0.0028 |
| 15.0                     | 9.3819          | 14.6701               | 0.4501     | 0.6356               | 0.0034 |
| 17.5                     | 10.1036         | 17.0139               | 0.5025     | 0.5816               | 0.0039 |
| 20.0                     | 10.8253         | 19.5313               | 0.5548     | 0.5239               | 0.0018 |
| 22.5                     | 11.5470         | 22.2222               | 0.6056     | 0.4621               | 0.0023 |
| 25.0                     | 12.2687         | 25.0868               | 0.6533     | 0.4002               | 0.0036 |
| 27.5                     | 12.9904         | 28.1250               | 0.6986     | 0.3352               | 0.0023 |
| 30.0                     | 13.7121         | 31.3368               | 0.7398     | 0.2814               | 0.0025 |

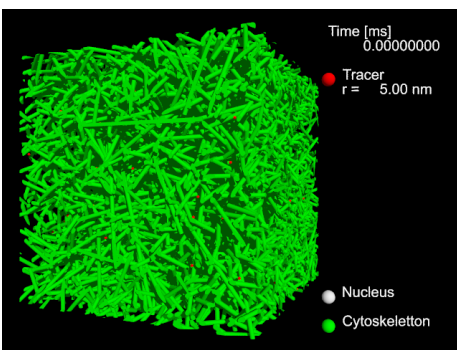

**Cytoskeleton  
Volume Fraction  
0.1490**

**Filament Properties**  
Radius = 7.5 nm  
Length = 500 nm  
Number = 6090

**Simulation Box Size**  
Length = 1000 nm

| $r_{\text{tracer}}$ [nm] | $\Delta x$ [nm]                                              | $\Delta t$ [ $\mu$ s] | $\epsilon$ | $D_{\text{eff}}/D_0$ | SD     |
|--------------------------|--------------------------------------------------------------|-----------------------|------------|----------------------|--------|
| 0.0                      | 2.1651                                                       | 0.7813                | 0.1490     | 0.8920               | 0.0147 |
| 2.5                      | 2.8868                                                       | 1.3889                | 0.2516     | 0.8052               | 0.0060 |
| 5.0                      | 3.6084                                                       | 2.1701                | 0.3661     | 0.7088               | 0.0046 |
| 7.5                      | 4.3301                                                       | 3.1250                | 0.4854     | 0.5923               | 0.0032 |
| 10.0                     | 5.0518                                                       | 4.2535                | 0.5981     | 0.4686               | 0.0035 |
| 12.5                     | 5.7735                                                       | 5.5556                | 0.6989     | 0.3442               | 0.0043 |
| 15.0                     | 6.4952                                                       | 7.0313                | 0.7846     | 0.2236               | 0.0016 |
| 17.5                     | 7.2169                                                       | 8.6806                | 0.8526     | 0.1204               | 0.0007 |
| 20.0                     | 7.9386                                                       | 10.5035               | 0.9032     | 0.0430               | 0.0008 |
| 22.5                     | 8.6603                                                       | 12.5000               | 0.9401     | 0.0065               | 0.0002 |
| 25.0                     | Test particles do not fit into the spaces of the network ... |                       |            |                      |        |
| 27.5                     | Test particles do not fit into the spaces of the network ... |                       |            |                      |        |
| 30.0                     | Test particles do not fit into the spaces of the network ... |                       |            |                      |        |

$$\Delta x = 0.5 \cdot (r_{\text{fiber}} + r_{\text{tracer}}) / \sqrt{3}; \quad \Delta t = \Delta x^2 / (6D_0) \text{ based on Eq. 2, } D_0 = 1 \mu\text{m}^2/\text{s}; \quad \epsilon = \text{excluded volume fraction}$$
